# Supplementary material
Source: PubMed Central journal article supplement (PMC4297473)

**A**

|                            | P1    | P3    |
|----------------------------|-------|-------|
| Single nucleotide variants | 59301 | 32916 |
| Nonsynonymous variants     | 7373  | 11894 |
| Novel or Rare Variants     | 664   | 3909  |
| Homozygous                 | 85    | 14    |
| Predicted damaging         | 1     | 3     |
| In linkage regions         | -     | 1     |

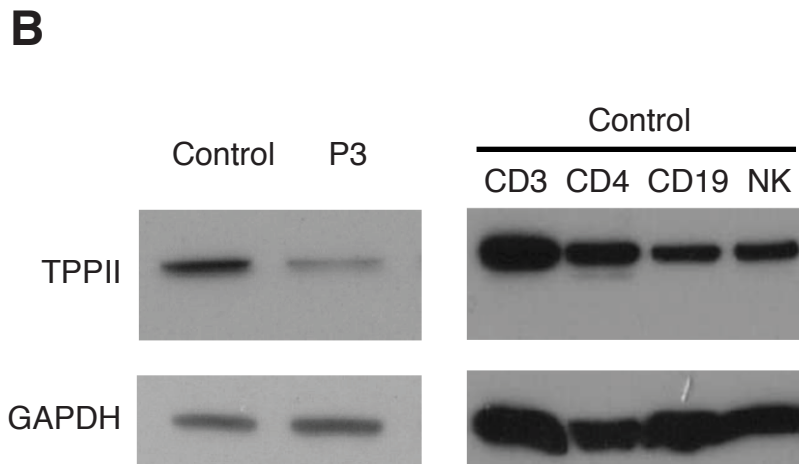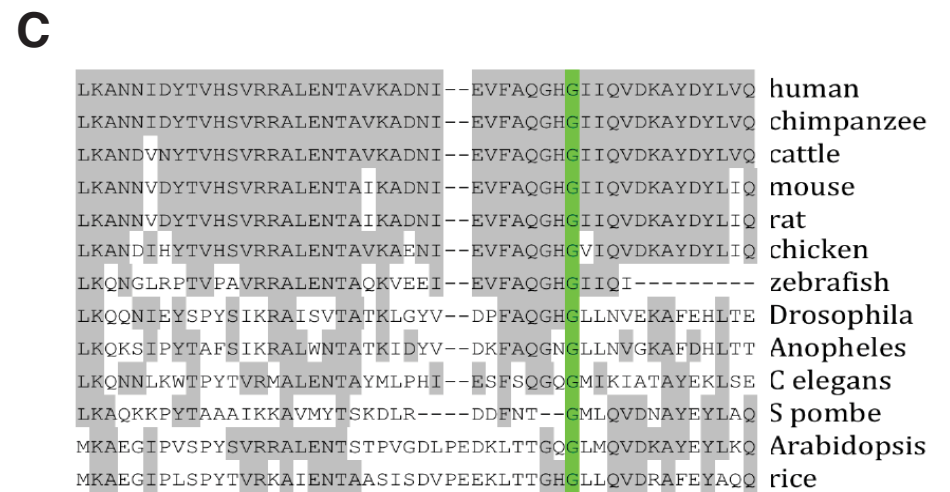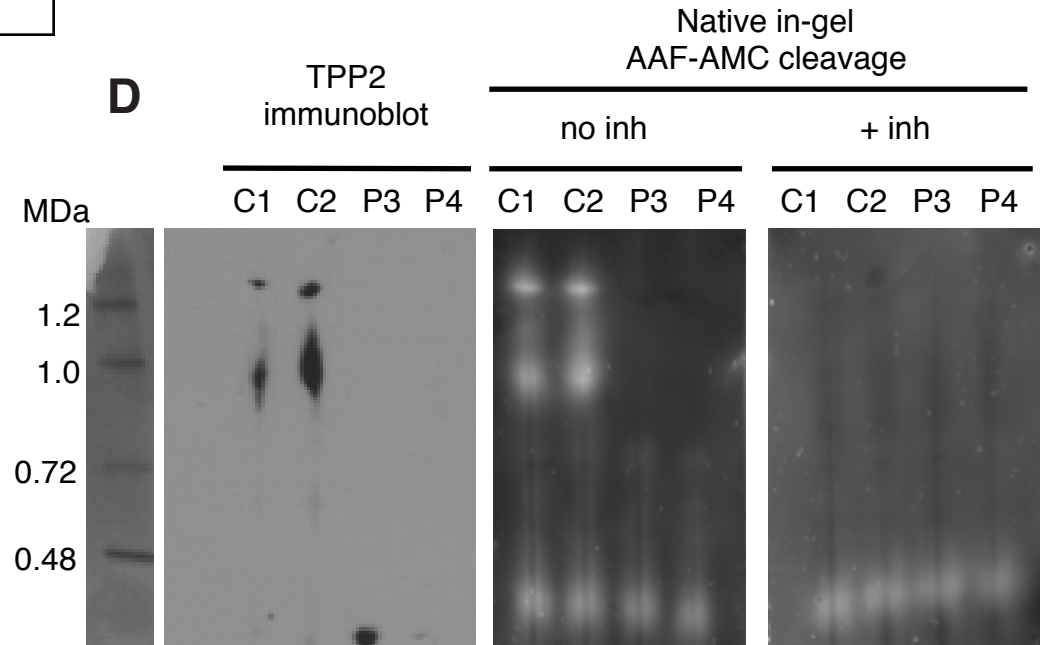

Supplement: NIHMS646780-supplement-2.pdf [file NIHMS646780-supplement-2.pdf]
