# Supplementary material
Source: PubMed Central journal article supplement (PMC4297473)

**A**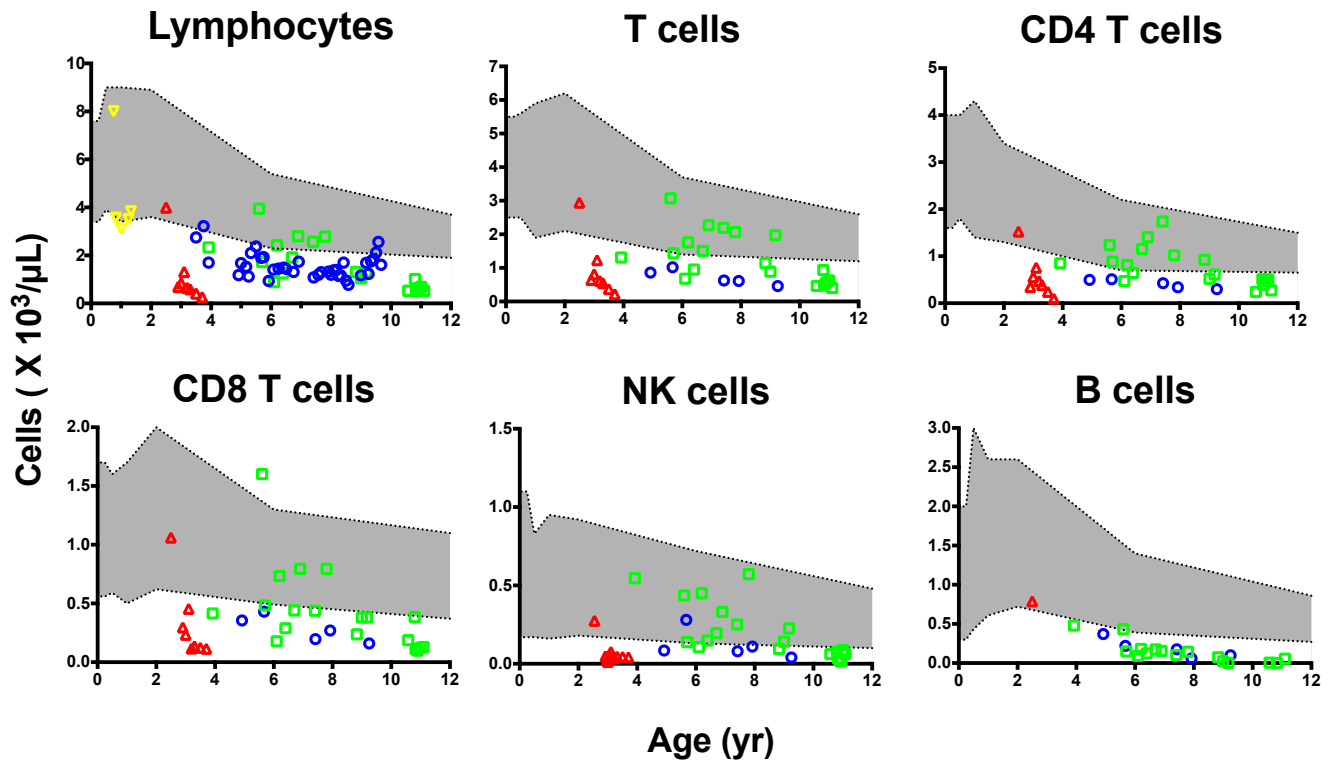**B**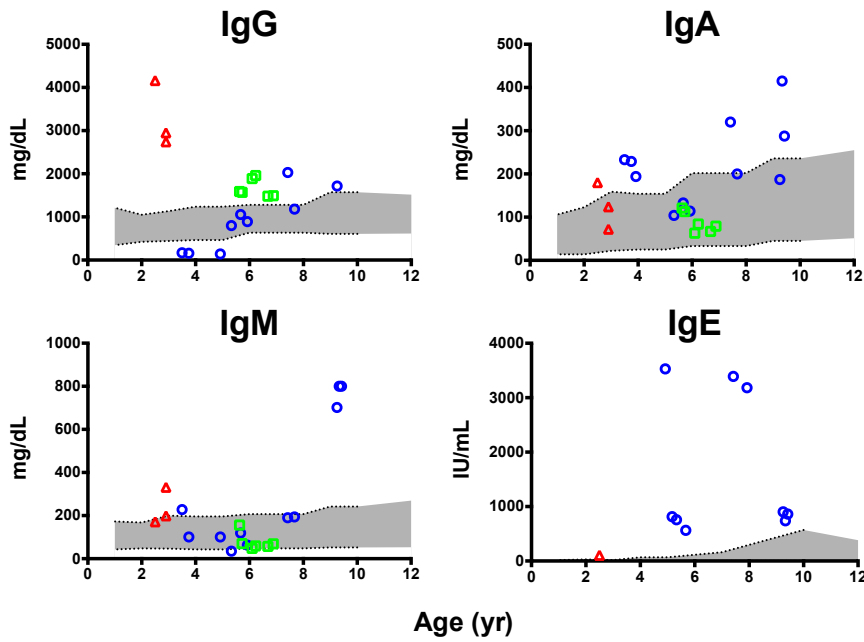**C**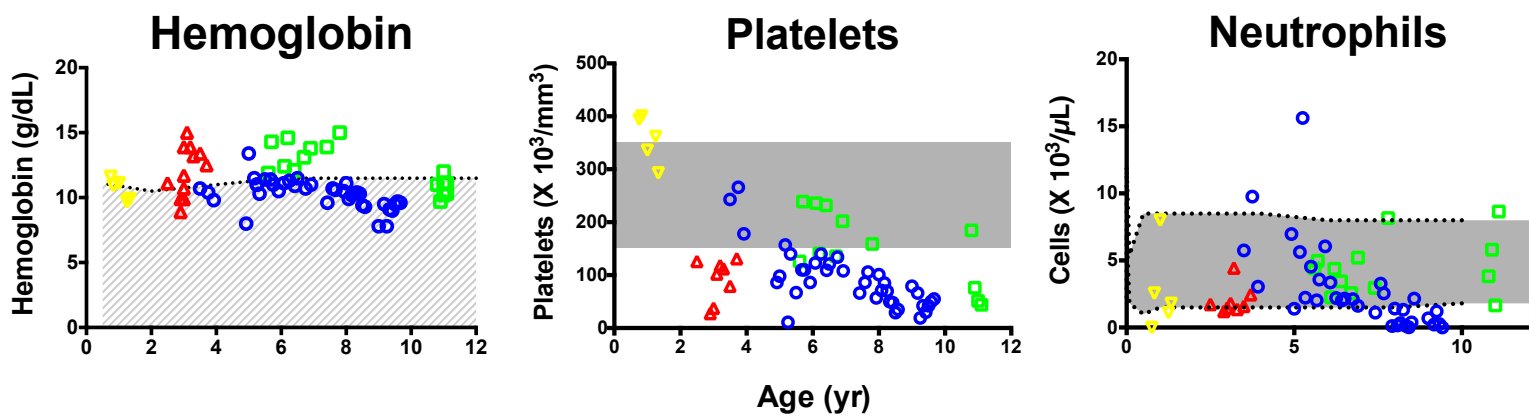

Supplement: NIHMS646780-supplement-1.pdf [file NIHMS646780-supplement-1.pdf]

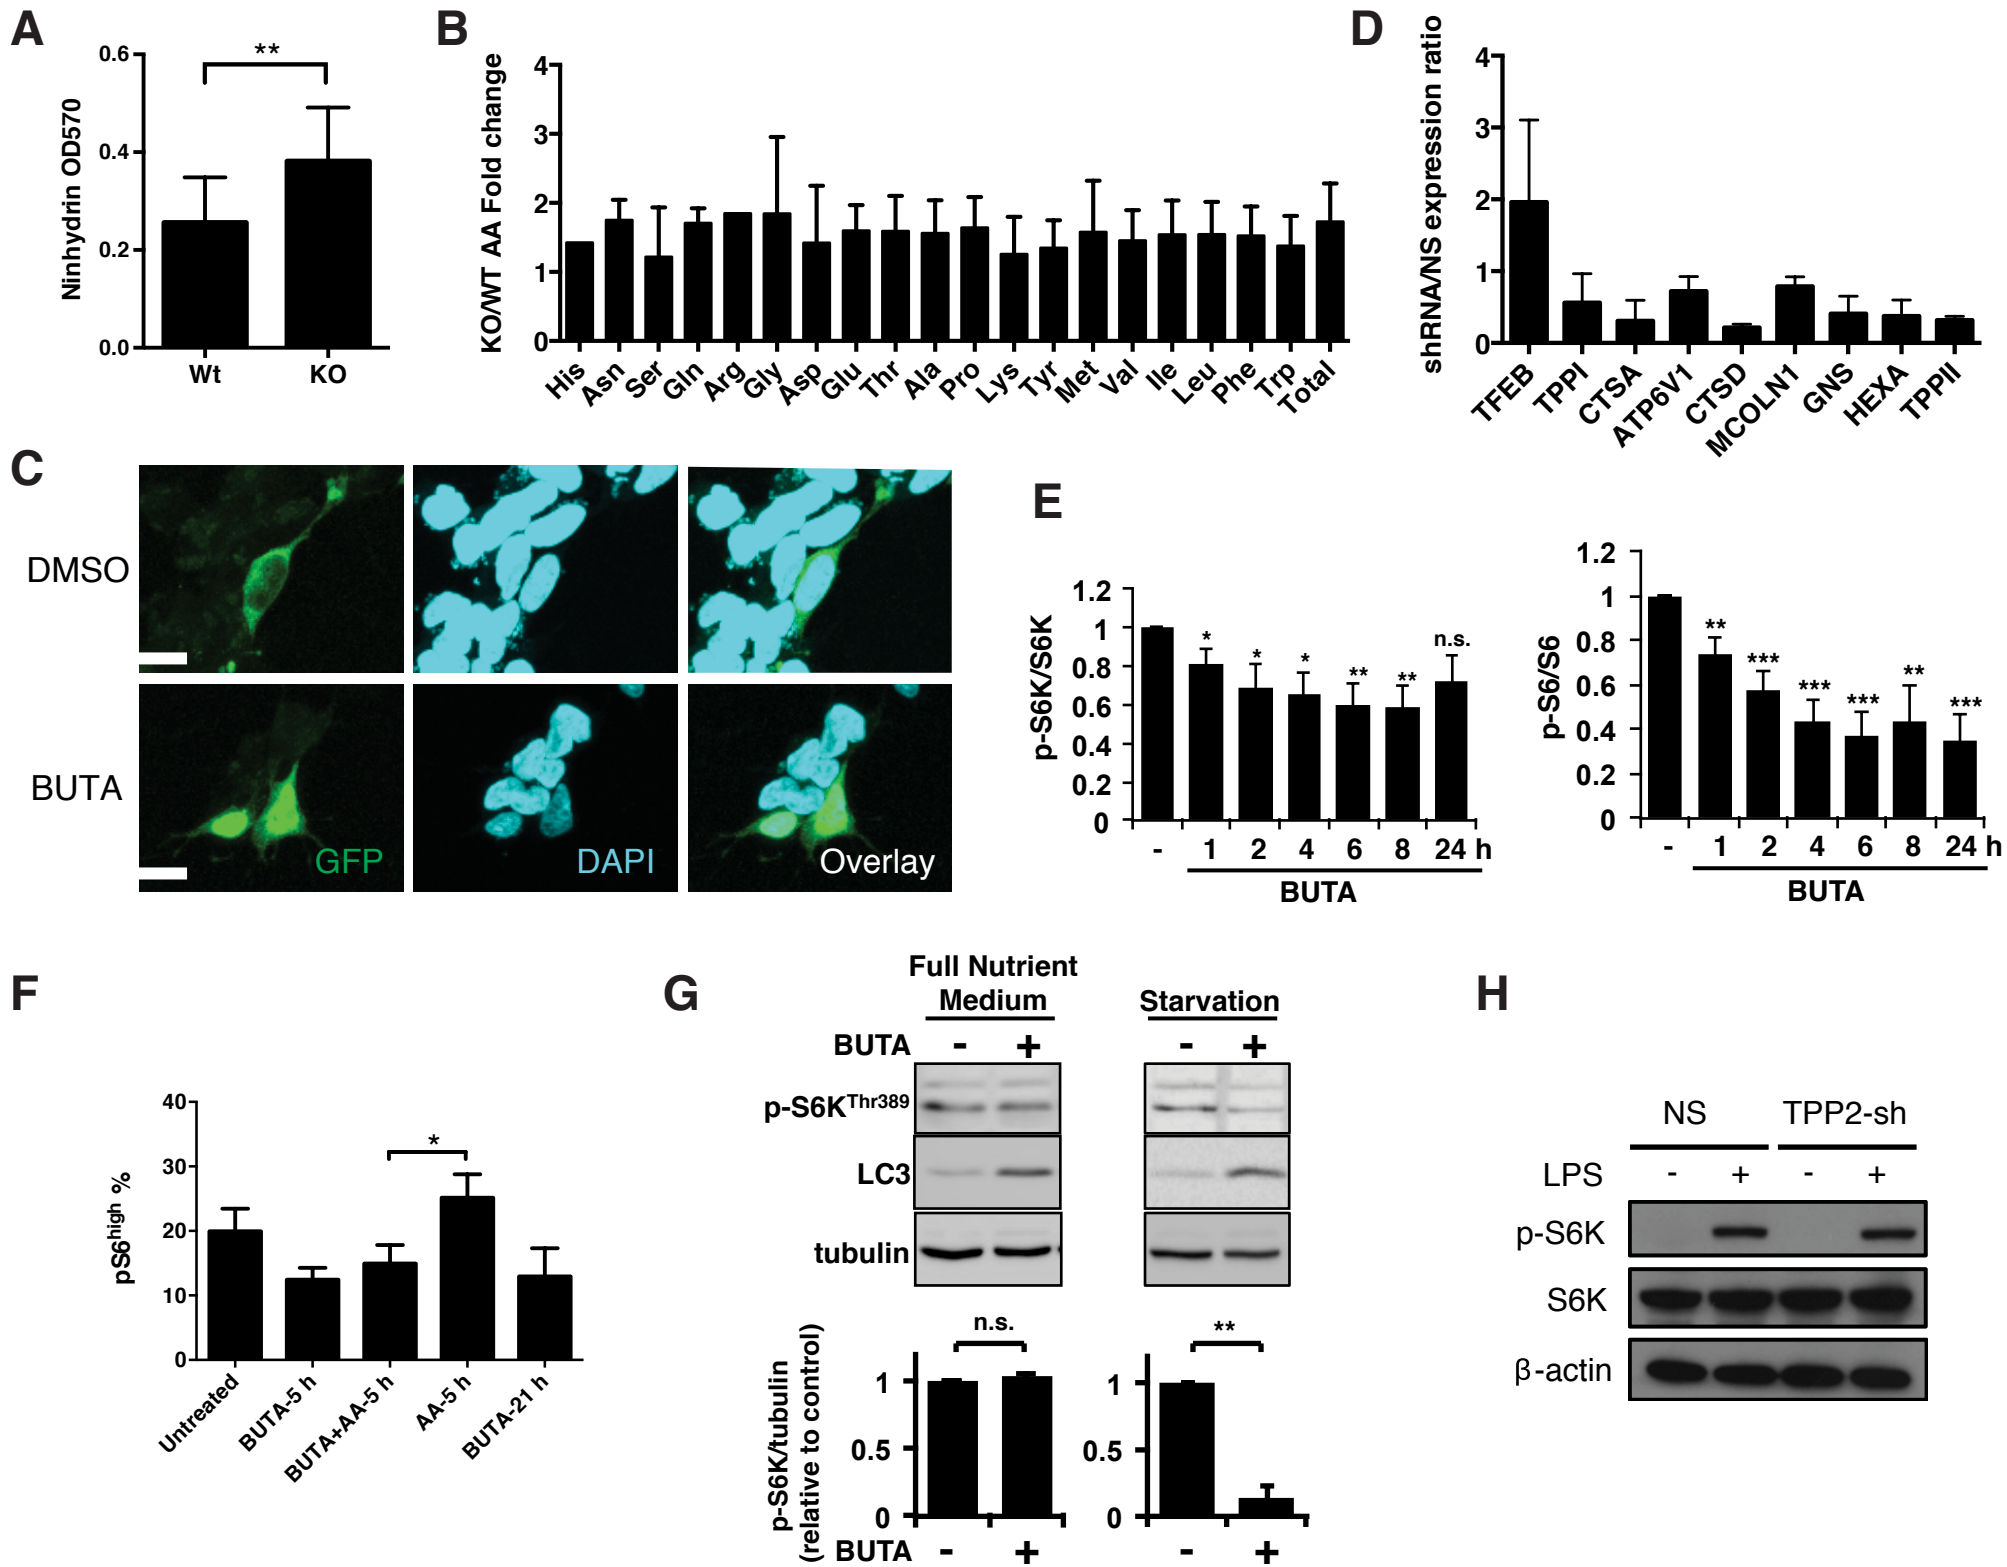

Supplement: NIHMS646780-supplement-3.pdf [file NIHMS646780-supplement-3.pdf]

**A**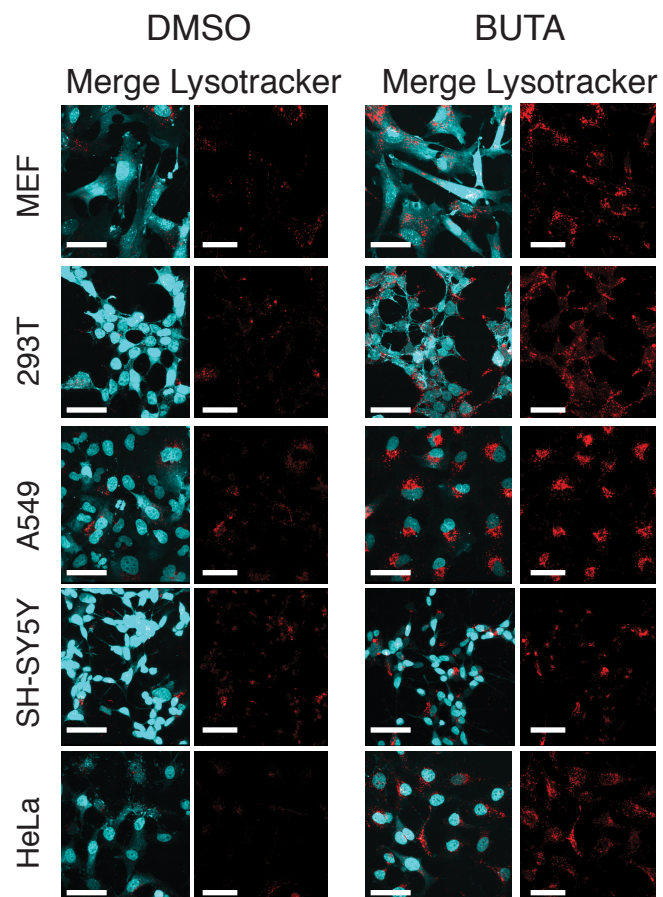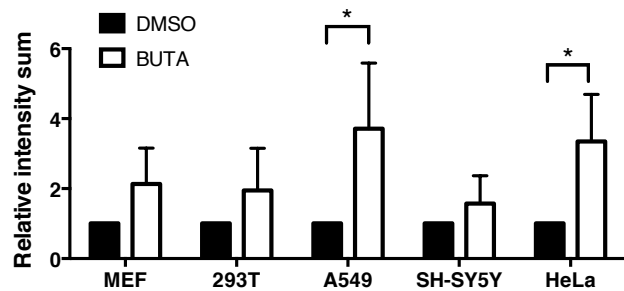**B**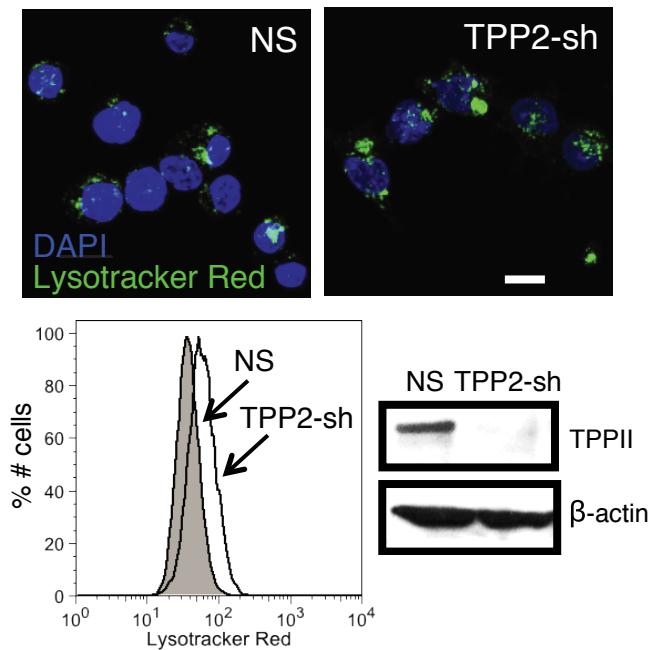**C**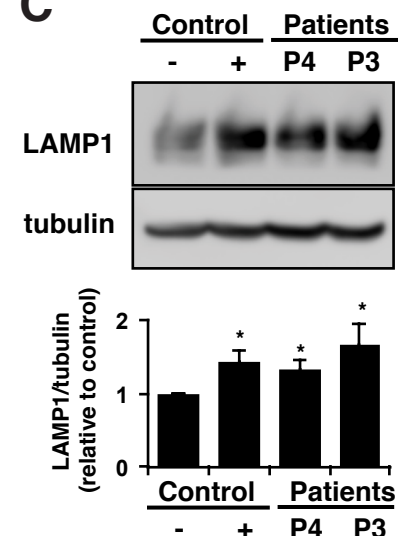**D**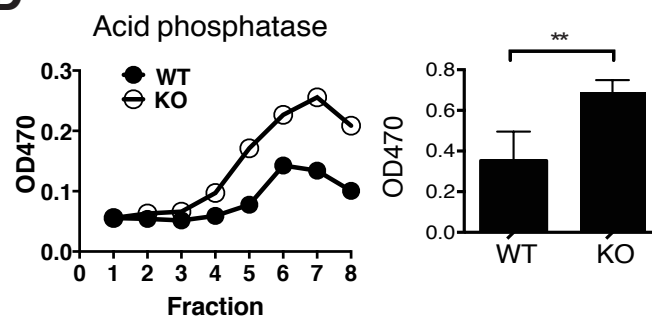**F**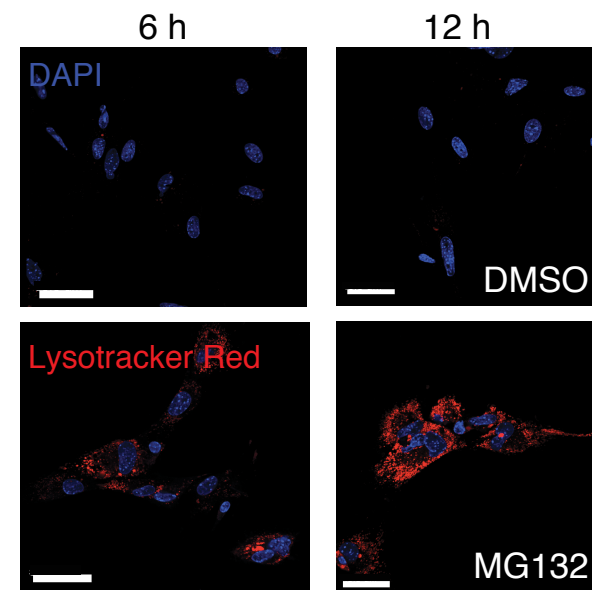**E**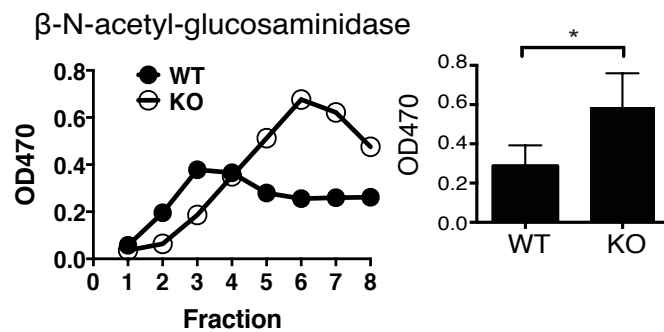

Supplement: NIHMS646780-supplement-4.pdf [file NIHMS646780-supplement-4.pdf]

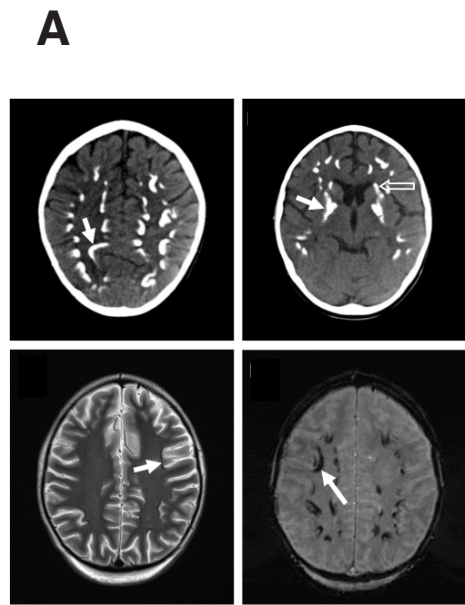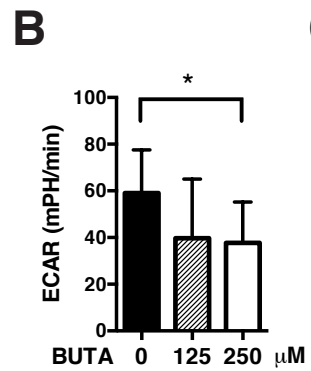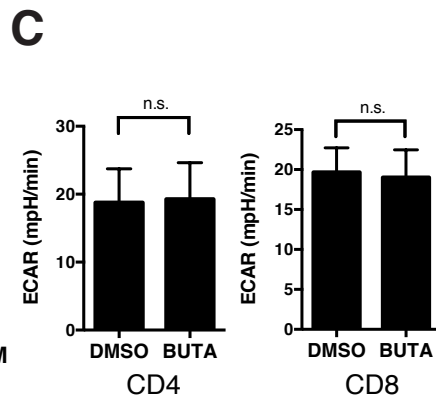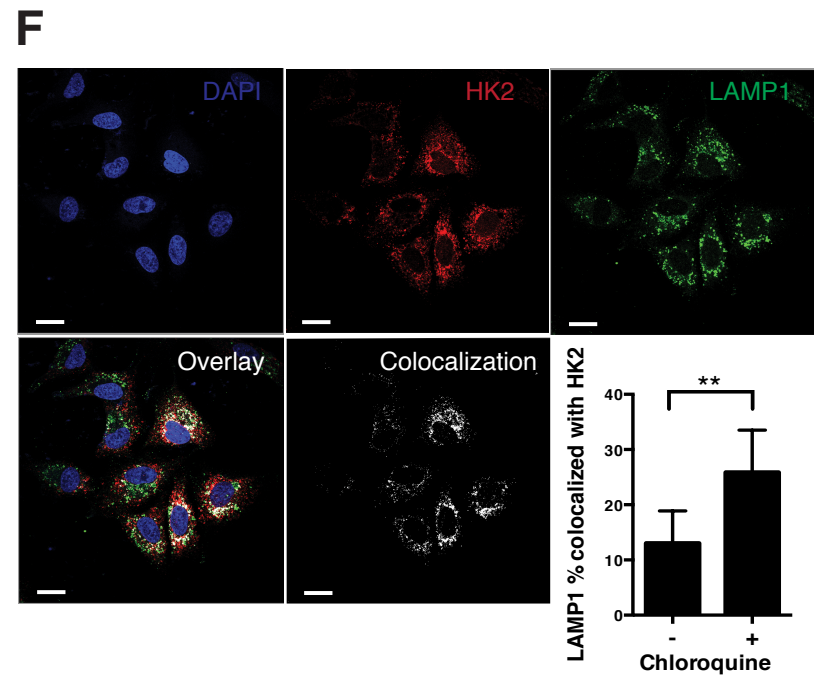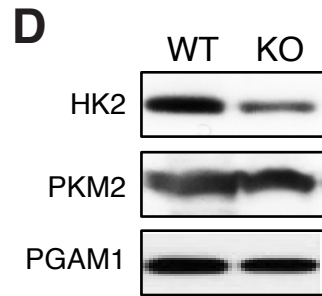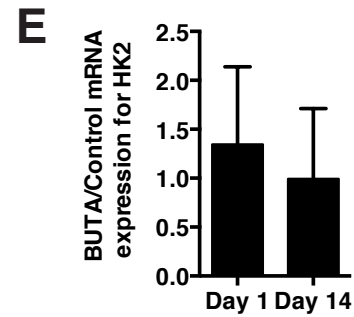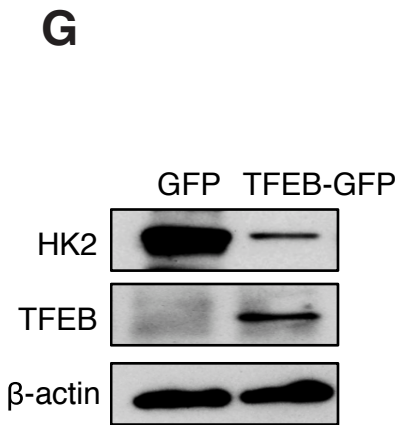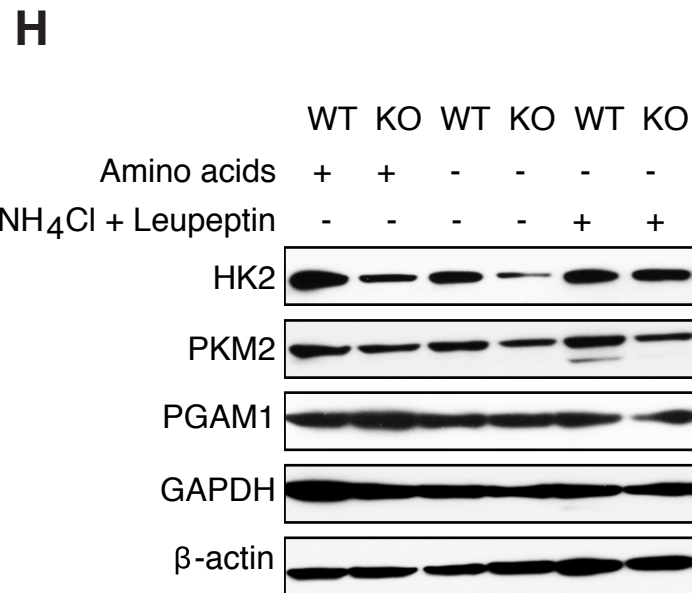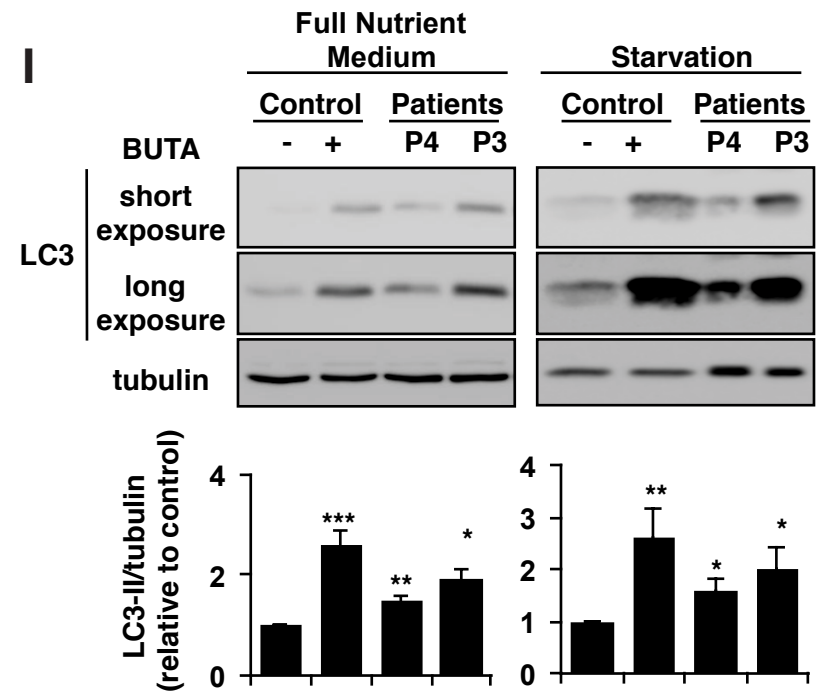

Supplement: NIHMS646780-supplement-5.pdf [file NIHMS646780-supplement-5.pdf]

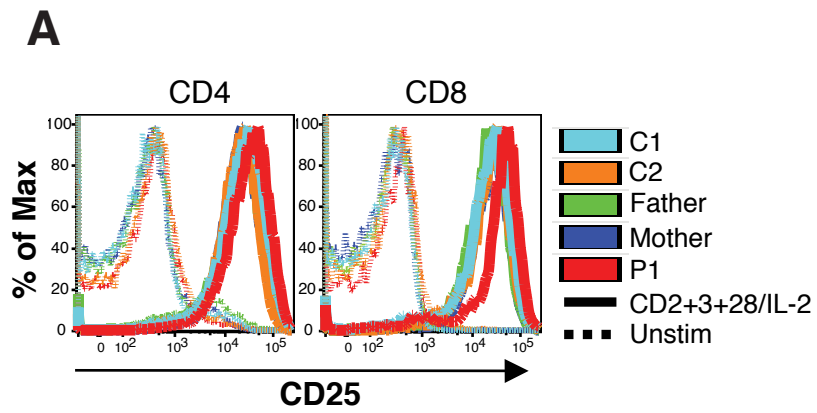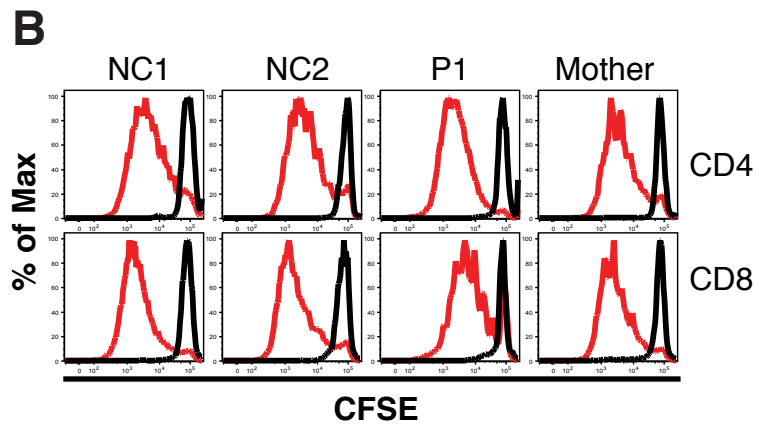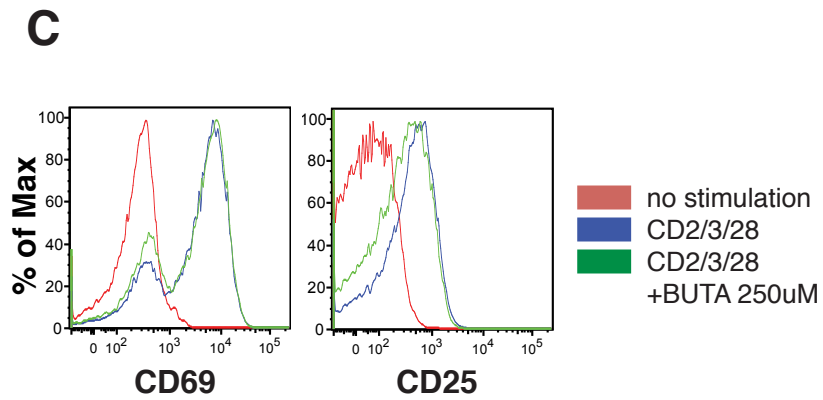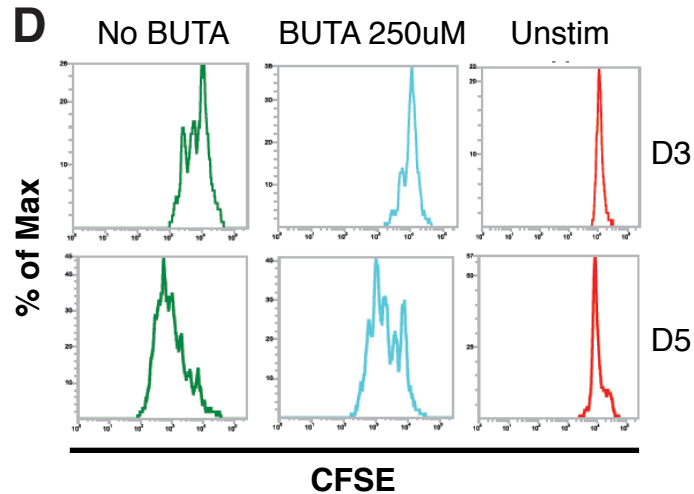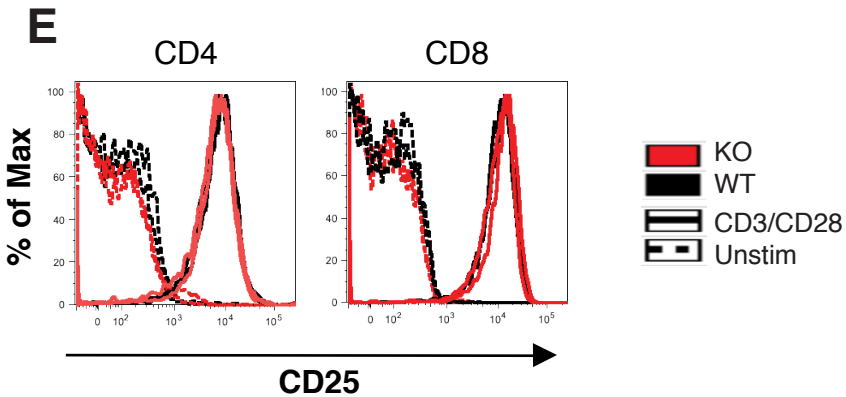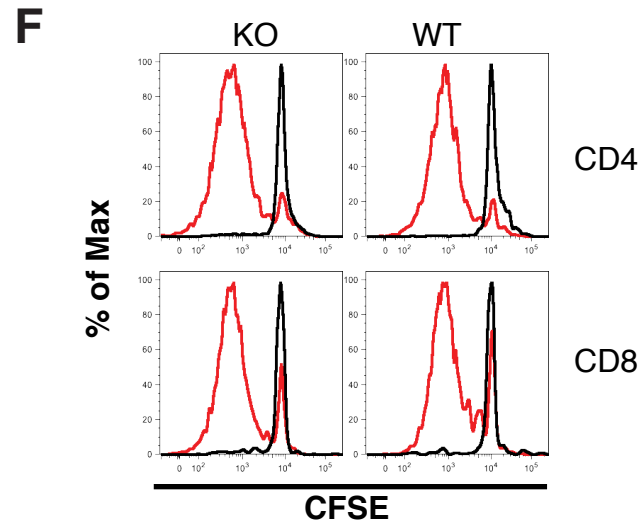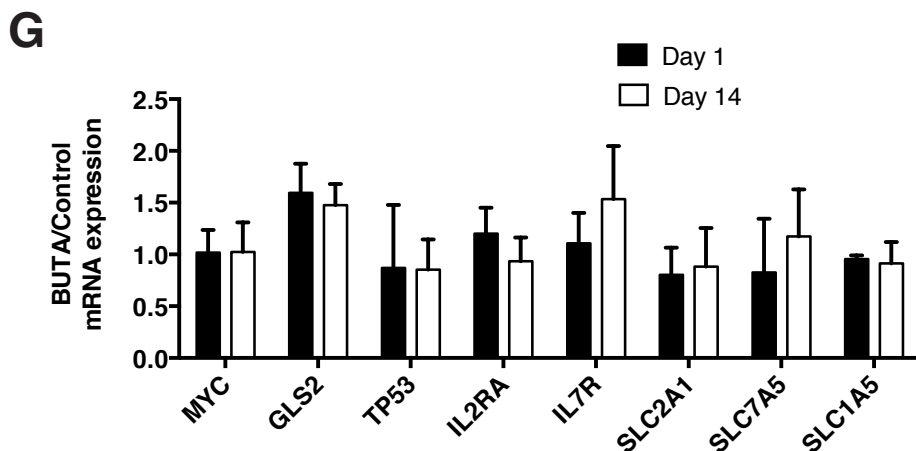

Supplement: NIHMS646780-supplement-6.pdf [file NIHMS646780-supplement-6.pdf]

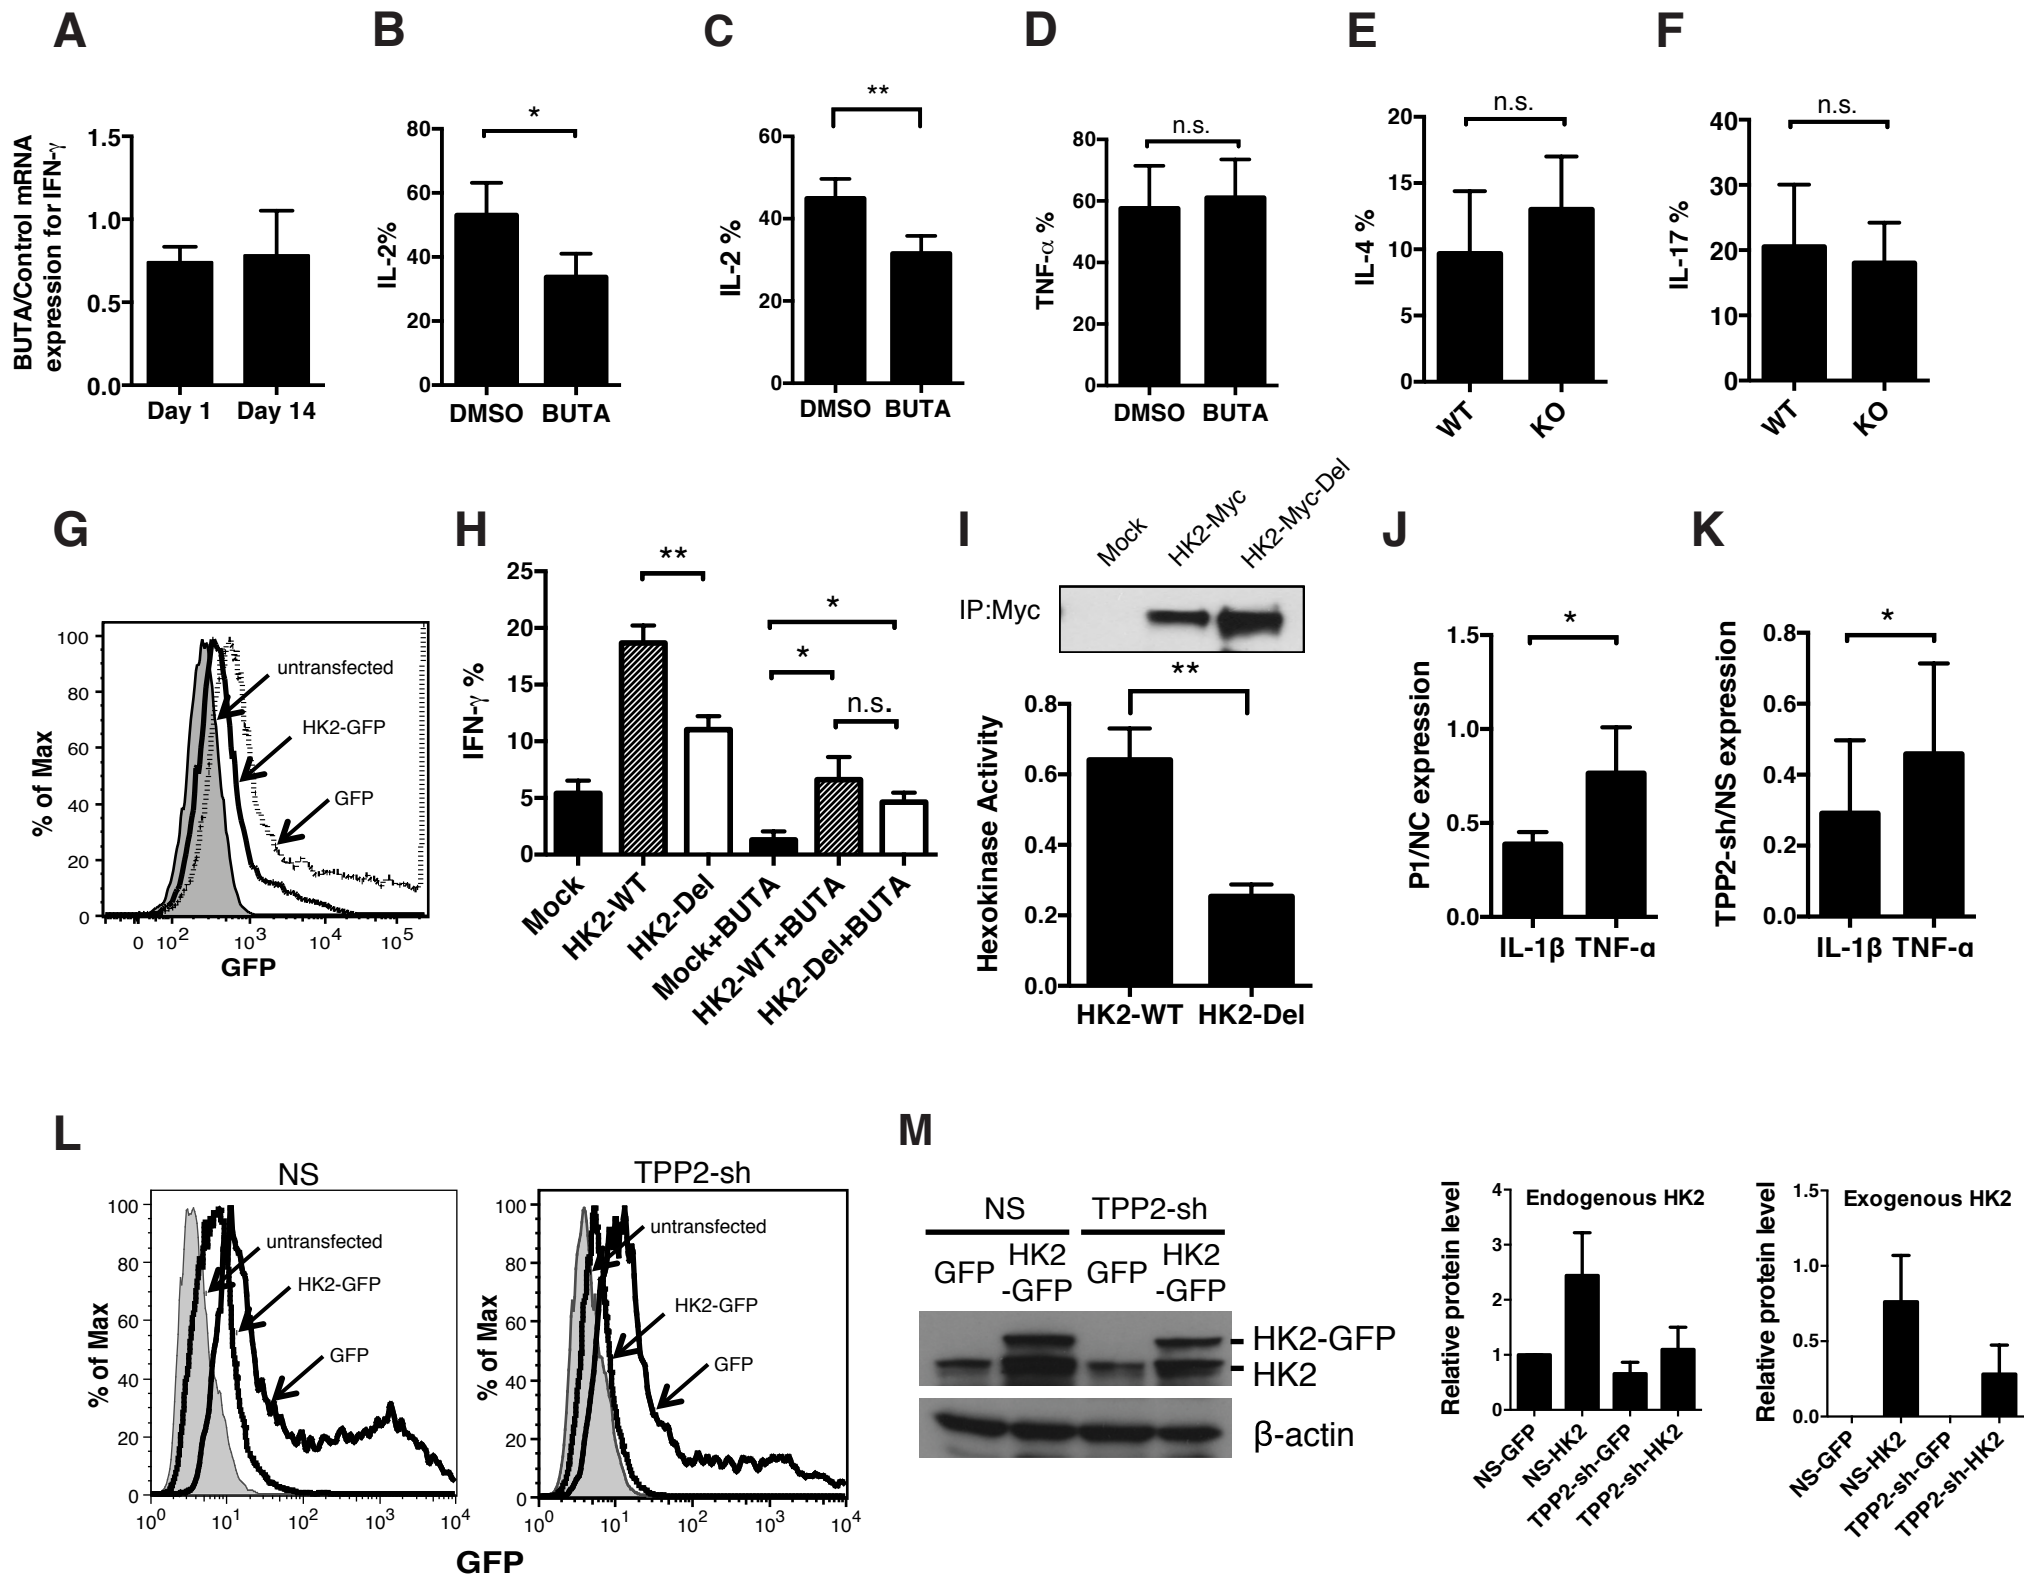

Supplement: NIHMS646780-supplement-7.pdf [file NIHMS646780-supplement-7.pdf]
